1 **TK216 targets microtubules in Ewing sarcoma cells**

2

3 Juan Manuel Povedano<sup>a,b</sup>, Vicky Li<sup>a,b</sup>, Katherine E. Lake<sup>a,b</sup>, Xin Bai<sup>a,b</sup>, Rameshu Rallabandi<sup>b,c,d</sup>,

4 Jiwoong Kim<sup>e</sup>, Yang Xie<sup>e</sup>, Jef K. De Brabander<sup>b,c,d</sup>, and David G. McFadden<sup>a,b,c,d,\*</sup>

5

6 <sup>a</sup> Department of Internal Medicine, Division of Endocrinology

7 <sup>b</sup> Department of Biochemistry

8 <sup>c</sup> Harold C. Simmons Comprehensive Cancer Center

9 <sup>d</sup> Program in Molecular Medicine

10 <sup>e</sup> Department of Population and Data Sciences

11 University of Texas Southwestern Medical Center, Dallas, TX 75390 USA

12 \* Corresponding Author: [david.mcfadden@utsouthwestern.edu](mailto:david.mcfadden@utsouthwestern.edu)

13 **ABSTRACT:**

14 Ewing sarcoma (EWS) is a pediatric malignancy driven by the EWSR1-FLI1 fusion protein formed  
15 by the chromosomal translocation t(11;22). The small molecule TK216 was developed as a first-  
16 in-class direct EWSR1-FLI1 inhibitor and is in phase II clinical trials in combination with vincristine  
17 for EWS patients. However, TK216 exhibits anti-cancer activity against cancer cell lines and  
18 xenografts that do not express EWSR1-FLI1, and the mechanism underlying cytotoxicity remains  
19 unresolved. We apply a forward genetics screening platform utilizing engineered hypermutation  
20 in EWS cell lines and identify recurrent mutations in *TUBA1B*, encoding  $\alpha$ -tubulin, that prove  
21 sufficient to drive resistance to TK216. Using reconstituted microtubule (MT) polymerization in  
22 vitro and cell-based chemical probe competition assays, we demonstrate that TK216 acts as an  
23 MT destabilizing agent. This work defines the mechanism of cytotoxicity of TK216, explains the  
24 synergy observed with vincristine, and calls for a reexamination of ongoing clinical trials with  
25 TK216.

26 **MAIN TEXT:**

27 EWS is defined by chromosomal translocations that lead to the expression of oncogenic fusion  
28 proteins of the EWSR1-FLI1 family. The EWSR1-FLI1 family of proteins is formed by the fusion  
29 of protein sequences of low complexity from EWSR1, FUS or TAF15 to the DNA-binding domain  
30 of an E26 transformation-specific (ETS) family transcription factor, most frequently FLI1 or ERG<sup>1</sup>.  
31 The EWSR1-FLI1 protein lacks known enzymatic activity or defined small molecule binding  
32 pockets; therefore, rational therapeutic targeting of the protein represents a major challenge.

33 YK-4-279 is the first small molecule reported to directly target EWSR1-FLI1. It was  
34 identified as a small molecule capable of disrupting an interaction between EWSR1-FLI1 and  
35 RNA helicase A (encoded by DHX9). YK-4-279 induced apoptotic cell death in EWS cell lines  
36 and suppressed growth of EWS xenografts<sup>2</sup>. YK-4-279 was subsequently shown to induce G<sub>2</sub>-M  
37 cell cycle arrest and apoptosis in synergy with the MT destabilizing agent vincristine<sup>3</sup>. TK216, a  
38 clinical derivative of YK-4-279, has entered phase II clinical trials in EWS patients as monotherapy  
39 and in combination with vincristine, and a subset of patients exhibits promising responses<sup>4</sup>.

40 Since the original identification of YK-4-279 as an inhibitor of EWSR1-FLI1, the molecule  
41 has been shown to suppress growth of a variety of cancer cell lines not driven by EWSR1-FLI1,  
42 including prostate cancer, neuroblastoma, lymphoma, melanoma and thyroid cancer<sup>5-9</sup>. In  
43 addition, genetic suppression of EWSR1-FLI1 induced cell cycle arrest at a different checkpoint:  
44 the G<sub>1</sub>-S transition<sup>10</sup>. These findings have raised questions regarding the mechanism underlying  
45 cytotoxicity induced by YK-4-279, which remains unresolved.

46 We previously reported that engineered DNA mismatch repair (MMR) deficiency induces  
47 hypermutation in cancer cell lines that facilitates the emergence of compound resistant alleles<sup>11</sup>.  
48 These mutations can reveal the direct protein targets of cytotoxic small molecules<sup>11-14</sup>. We sought  
49 to uncover the mechanism of action of TK216-induced cytotoxicity using this unbiased forward  
50 genetics platform. We performed forward genetic screening with TK216 using MMR-deficient  
51 A673 EWS cells at three concentrations flanking the IC<sub>100</sub><sup>1wk</sup> (Fig. 1A, Methods). Six compound-

52 resistant clones (TK216 A-F) emerged following TK216 selections. We confirmed resistance to  
53 TK216 in all six clones (range from 1.98- to 2.74-fold compared to parental MMR-deficient A673-  
54 M1 cells) (Fig. 1B,D). To ensure generalized mechanisms of resistance did not underlie  
55 emergence of TK216-resistant clones, we tested unrelated anti-cancer toxins etoposide and  
56 MLN4924 and confirmed that the clones were specifically resistant to TK216 (Fig. 1C;  
57 Supplementary Fig. 1A).

58 We identified recurrently mutated genes in the TK216-resistant clones by exome  
59 sequencing<sup>15</sup>. Two genes, *TUBA1B* and *BRWD3*, were mutated in four out of six clones, with no  
60 other gene recurrently mutated in more than four clones (Fig. 1E). No mutations were identified  
61 in *EWSR1*, *FLI1*, or *DHX9* (Supplemental Table). We compared somatic mutations between  
62 TK216-resistant clones to establish whether clones were related or arose independently. TK216-  
63 A and TK216-C clones shared 91 mutations, suggesting that these clones were closely related.  
64 No other clones shared more than 11 somatic mutations. We prioritized *TUBA1B*, encoding  $\alpha$ -  
65 tubulin, as a candidate gene because independent clones harbored recurrent mutations in two  
66 codons leading to different amino acid substitutions, G142A/S and D47G/H. The observation of  
67 different substitutions of the same codon suggested strong selective pressure for alteration of  
68 these specific residues of tubulin in the presence of TK216 (Fig. 1D,F). Interestingly, the G142S  
69 mutation was previously reported to confer resistance to the MT destabilizing agent dinitroaniline,  
70 raising the possibility that TK216 targeted MTs<sup>16</sup>.

71 We used CRISPR/Cas9 to engineer each mutation into A673 EWS cells to determine  
72 whether codon 47 and codon 142 mutations in *TUBA1B* were sufficient to induce resistance to  
73 either YK-4-279 or TK216 (Methods). Cells nucleofected with CRISPR-Cas9 components were  
74 selected with TK216 (1  $\mu$ M) for 2 weeks followed by crystal violet staining. Emerging clones were  
75 observed in cells transfected with the *TUBA1B* mutation repair templates whereas no clones were  
76 visible in the control condition without Cas9 protein or the repair template (Fig. 1G). This result  
77 suggested that *TUBA1B* codon 47 or 142 mutation was sufficient to confer resistance to TK216.

78 We expanded resistant pools of *TUBA1B*<sup>G142</sup> and *TUBA1B*<sup>D47</sup> cells and validated mutations  
79 by Sanger sequencing (Supplementary Fig. 2A-C). The engineered *TUBA1B*<sup>G142A</sup> mutation  
80 appeared to be homozygous, whereas the *TUBA1B*<sup>G142S</sup> and *TUBA1B*<sup>D47H</sup> mutations were  
81 heterozygous or present in one third of alleles, respectively. We performed dose-response curves  
82 of parental and mutant cell pools. *TUBA1B*<sup>G142S</sup>, *TUBA1B*<sup>G142A</sup>, and *TUBA1B*<sup>D47H</sup> mutations were  
83 independently sufficient to confer resistance to YK-4-279 and TK216 (Fig. 1H-J; Supplementary  
84 Fig. 2D-F). *TUBA1B*<sup>G142A</sup> cells exhibited the greatest degree of resistance to TK216, possibly  
85 relating to homozygosity of the engineered mutation. A673-*TUBA1B*<sup>G142A</sup>, -*TUBA1B*<sup>G142A</sup>, and -  
86 *TUBA1B*<sup>D47H</sup> cells were not resistant to the DNA polymerase  $\alpha$  inhibitor CD437 or the neddylation-  
87 activating enzyme inhibitor MLN4924 (Supplementary Fig. 2G-L).

88 Both YK-4-279 and TK216 contain a chiral center, and previous studies demonstrated that  
89 the (-)-YK-4-279 enantiomer was responsible for the anti-cancer activity in EWS cells<sup>17</sup>. We  
90 separated (+)-TK216 and (-)-TK216 enantiomers to 98.8% and 99.4% purity, respectively, using  
91 supercritical fluid chromatography (SFC) (Lotus Separations, LLC). Consistent with prior reports,  
92 (-)-TK216 enantiomer exhibited 56-fold greater anti-cancer activity in Ewing sarcoma cells (IC<sub>50</sub> =  
93 0.26  $\mu$ M), compared to the (+)-TK216 enantiomer (IC<sub>50</sub> = 14.57  $\mu$ M) (Supplementary Fig. 3A,B).  
94 *TUBA1B*<sup>G142S</sup>, *TUBA1B*<sup>G142A</sup>, and *TUBA1B*<sup>D47H</sup> mutations were also sufficient to confer resistance  
95 to purified (-)-TK216 enantiomer (Fig. 1K-M). Thus, introduction of a single *TUBA1B* mutation  
96 identified by forward genetics screening in EWS cells was sufficient to endow resistance to YK-  
97 4-279, TK216, and (-)-TK216 enantiomer.

98 Review of the crystal structure of the  $\alpha$ -tubulin: $\beta$ -tubulin dimer placed G142 and D47  
99 mutations at opposite interfaces of the heterodimer, making it unlikely that these mutations  
100 impaired interaction of TK216 by altering a single binding pocket (Fig. 1F). We hypothesized that  
101 TK216 might act as an MT destabilizing agent, and that G142 and D47 mutations induce  
102 resistance to TK216 by stabilizing MTs. We therefore tested whether G142A and G142S  
103 mutations also conferred resistance to other MT destabilizing agents. Indeed, A673-

104 *TUBA1B*<sup>G142A</sup>, *-TUBA1B*<sup>G142A</sup>, and *-TUBA1B*<sup>D47H</sup> cells exhibited resistance to colchicine  
105 (Supplementary Fig. 2M-O).

106 These studies suggested a model in which anti-proliferative activity of YK-4-279 and  
107 TK216 stemmed from their action as MT destabilizing agents in EWS cells. We sought to  
108 reconstitute MT polymerization *in vitro* to directly assess whether YK-4-279 and TK216 altered  
109 MT function. MTs are dynamic structures composed of  $\alpha$ -tubulin: $\beta$ -tubulin heterodimers that  
110 polymerize and de-polymerize through a phenomenon called dynamic instability<sup>18</sup>. We used an  
111 MT turbidity assay to determine whether YK-4-279 and TK216 impacted MT dynamics. This assay  
112 measures the formation of MT polymers by reading absorbance of a mixture of  $\alpha$ -tubulin: $\beta$ -tubulin  
113 heterodimers in conditions that facilitate polymerization. Using a molar ratio of compound:tubulin  
114 (2:1), 5  $\mu$ M of YK-4-279 and TK216 inhibited MT polymerization. The positive control, colchicine  
115 (5  $\mu$ M), also potently suppressed MT polymerization (Fig. 2A). Inhibition of MT polymerization  
116 was evident with 0.5  $\mu$ M of TK216 and increased in a dose dependent manner to the maximum  
117 concentration tested (20  $\mu$ M) (Fig. 2B). To exclude nonspecific small molecule assay  
118 interference, we tested CD437 and observed no impact on MT polymerization (Fig. 2A).

119 We next evaluated whether inhibition of MT polymerization was enantiomer specific.  
120 Indeed, (-)-TK216 potently inhibited MT polymerization whereas (+)-TK216 did not disrupt MT  
121 polymerization (Fig. 2C). Therefore, the anti-proliferative activity and inhibition of MT  
122 polymerization were both unique properties of the (-)-enantiomer of TK216.

123 Treatment of cells and xenografts with YK-4-279 was reported to synergize with  
124 vincristine; however, the mechanism underlying synergy has not been elucidated. If YK-4-279  
125 and vincristine both target MTs, how can synergy between these agents be explained? Distinct  
126 chemical families target MTs through several different binding pockets<sup>19</sup>. We hypothesized that  
127 synergy between TK216 and vincristine could be explained if these agents acted on distinct MT  
128 binding pockets. We previously reported the development of a tubulin chemical probe that  
129 covalently modifies Cys239 within the colchicine binding pocket of  $\beta$ -tubulin<sup>14</sup>. We developed a

130 cell-based competition assay using the tubulin chemical probe and showed that small molecules  
131 acting through the colchicine binding pocket competed the benzamide probe whereas vincristine,  
132 which acts through a separate vinca alkaloid binding pocket, did not<sup>14</sup>.

133 To test whether TK216 and vincristine acted through the same or different MT binding  
134 pockets, we performed tubulin probe competitions with TK216 in A673 EWS cells (Methods). We  
135 confirmed the fidelity of the probe competition assay by testing chemically distinct MT  
136 destabilizing agents that act through the colchicine binding pocket, colchicine, rigosertib and  
137 tivantinib<sup>20-23</sup>. Indeed, colchicine, rigosertib, and tivantinib competed at concentrations above 0.8,  
138 1.6, and 6.3  $\mu\text{M}$  respectively. In contrast, CD437 exhibited no probe competition at concentrations  
139 up to 50  $\mu\text{M}$ , which was well above the  $\text{IC}_{50}$  for cytotoxicity ( $\sim 600$  nM) (Fig. 2D; Supplementary  
140 Fig. 4).

141 We next determined whether YK-4-279 and TK216 competed the tubulin chemical probe.  
142 Both compounds competed the benzamide probe at concentrations above 12.5  $\mu\text{M}$  (YK-4-279)  
143 and 6.3  $\mu\text{M}$  (TK216). We also performed tubulin probe competition assays using the purified  
144 TK216 enantiomers (Fig. 2D). (-)-TK216 potently competed the benzamide probe at  
145 concentrations above 1.6  $\mu\text{M}$ , whereas (+)-TK216 was devoid of tubulin probe competition activity  
146 at concentrations up to 50  $\mu\text{M}$  (Fig. 2D; Supplementary Fig. 5). Therefore, YK-4-279/TK216 and  
147 vincristine destabilize MTs through distinct binding mechanism. These results also demonstrate  
148 that binding to MTs in cells, inhibition of MT polymerization in vitro, and cytotoxicity (see Fig S1)  
149 were unique properties of the (-)-TK216 enantiomer.

150 Each experimental approach presented here, including unbiased forward genetics,  
151 reconstituted MT polymerization, and cell-based chemical probe assays converged upon the  
152 singular conclusion that TK216 exhibits anti-proliferative activity by acting as an MT destabilizing  
153 agent. Can these findings be reconciled with the scientific literature suggesting that YK-4-279  
154 and TK216 act directly on the EWSR1-FLI1 fusion protein? YK-4-279 was identified using a  
155 surface plasmon resonance assay to identify small molecules capable of binding recombinant

156 EWSR1-FLI1 protein<sup>2</sup>. At high concentration *in vitro* (30  $\mu$ M), YK-4-279 was found to displace  
157 binding of a 10 amino acid peptide from RNA helicase A to recombinant EWSR1-FLI1. The  
158 authors also reported that YK-4-279 blocked immunoprecipitation of RNA helicase A and EWSR1-  
159 FLI1 in EWS cells and suppressed EWSR1-FLI1-dependent transcription of the *NROB1* promoter,  
160 a validated EWSR1-FLI1 transcriptional target<sup>24</sup>.

161 Treatment of EWS cells with YK-4-279 induced cell cycle arrest at the G<sub>2</sub>-M transition, a  
162 hallmark phenotype of MT agents. In contrast, genetic suppression of EWSR1-FLI1 induced cell  
163 cycle arrest at a different checkpoint: the G<sub>1</sub>-S transition<sup>10</sup>. In addition, after the publication of  
164 Erkizan et al., a series of publications from independent laboratories demonstrated that YK-4-279  
165 induced cell death in several different cancer types, including prostate cancer, neuroblastoma,  
166 lymphoma, melanoma and thyroid cancer<sup>5-9</sup>. The discordance in the phenotypes induced by YK-  
167 4-279 and genetic suppression of EWSR1-FLI1, the induction of G<sub>2</sub>-M cell cycle arrest, and the  
168 broad anti-proliferative activity of YK-4-279 are consistent with the data presented here and the  
169 conclusion that YK-4-279 acts as an MT destabilizing agent. Whether the molecule also exhibits  
170 anti-cancer activity through binding EWSR1-FLI1 will require additional medicinal chemistry  
171 efforts to decouple such activity from MT destabilization.

172 Based on our chemical probe competition assays, we favor the hypothesis that TK216  
173 acts on tubulin through the colchicine binding site. However, it is important to recognize the  
174 possibility that TK216 binds outside the colchicine pocket and displaces the benzamide probe  
175 through an allosteric, or indirect, mechanism. It was also of interest that we identified recurrent  
176 mutations impacting  $\alpha$ -tubulin, rather than  $\beta$ -tubulin in TK216-resistant A673 clones. The  
177 colchicine binding pocket is encoded within  $\beta$ -tubulin, not  $\alpha$ -tubulin<sup>25</sup>. If TK216 competes our  
178 colchicine binding pocket chemical probe, then why were mutations in  $\beta$ -tubulin not identified?  $\beta$ -  
179 tubulin and  $\alpha$ -tubulin are each expressed as multiple isoforms from eight genes. Expression of  
180 the different tubulin genes varies between cell lineages and cancer cell lines, and many cell lines  
181 express relatively uniform levels of multiple  $\beta$ - and  $\alpha$ - tubulin genes. Therefore, a compound



182 resistant allele in a single tubulin gene is expected to result in limited impact on MT dynamics or  
183 resistance to an MT agent. Interestingly, whereas multiple  $\beta$ -tubulin isoforms are expressed at  
184 similar levels in A673 cells, *TUBA1B* is the dominantly expressed  $\alpha$ -tubulin (data not shown). We  
185 hypothesize that the emergence of *TUBA1B* mutations, rather than  $\beta$ -tubulin gene mutations, in  
186 our forward genetics screening stems from greater impact of a single mutation in *TUBA1B* on the  
187 cellular pool of MTs.

188 This study raises the possibility that agents targeting MTs through the colchicine binding  
189 pocket might offer clinical benefit in EWS and other tumors. Treatment with TK216 and vincristine  
190 induced tumor regression in a subset of patients enrolled in the phase I/II trial<sup>4</sup>. Our observation  
191 that TK216 and vincristine act through different binding sites provides a mechanistic explanation  
192 for the clinical activity of this combination. Rigosertib, which was initially developed as a Polo-like  
193 kinase 1 (PLK1) inhibitor, was subsequently shown to act as an MT destabilizing agent through  
194 the colchicine binding pocket<sup>20-23</sup>. Rigosertib, which has advanced to phase III clinical trials, likely  
195 represent the first colchicine binding pocket agent to exhibit a reasonable safety profile. The  
196 experience with rigosertib, and now TK216, highlights the importance of carefully uncovering the  
197 mechanism of action of small molecule therapeutics developed from target-based in vitro  
198 screening. However, the activity of these compounds in clinical trials also hints that MT agents  
199 acting through the colchicine binding pocket might offer clinical benefit in EWS and other cancers,  
200 alone or in combination with MT agents acting through separate binding pockets such as  
201 vincristine.

202 **Acknowledgements**

203 This work was supported by grants from the Welch Foundation (I-2040, D.G.M. and I-1422,  
204 J.K.D.B.), the National Cancer Institute of the NIH (U54CA231649, D.G.M.), a Disease-Oriented  
205 Scholar Award from UT Southwestern Medical Center (D.G.M.), a Clinical Investigator Award from  
206 the Damon Runyon Cancer Research Foundation (102-19, D.G.M.), the Cancer Prevention and  
207 Research Institute of Texas (RP190141, D.G.M.), and a Pilot Synergy Award from the UT  
208 Southwestern Dean's Circle of Friends (D.G.M. and J.K.D.B.). J.K.D.B. holds the Julie and Louis  
209 Beecherl, Jr., Chair in Medical Science. We thank Deepak Nijhawan for critically reading the  
210 manuscript and innumerable scientific discussions.

211

212 **Author contributions**

213 D.G.M. conceived the study. D.G.M. supervised research. J.M.P. designed and performed  
214 experiments. K.L., V.L., and X.B. performed experiments. R.R. and J.K.D.B. designed and  
215 synthesized chemical probes. J.K. analyzed exome sequencing data. Y.X. supervised J.K. and  
216 exome sequencing analysis. D.G.M. and J.M.P. wrote the manuscript.

217

218 **Declaration of Interest**

219 The authors declare no competing interests.

## 220 **METHODS**

### 221 **Cell Lines**

222 Ewing sarcoma A673 cell lines were cultured at 37°C and 5% CO<sub>2</sub> in RPMI (R8758, Sigma-  
223 Aldrich) and supplemented with 10% FBS (#35-150-CV, Corning), 2 mM L-glutamine (G7513,  
224 Sigma-Aldrich), and penicillin/streptomycin (P0781, Sigma-Aldrich). Cells were pasaged using  
225 trypsin (T4049, Sigma-Aldrich) every 3-4 days. Parental A673 cell lines are derived from a female  
226 subject and were authenticated by STR profiling. Mouse small cell lung cancer 518T2 cells were  
227 previously reported<sup>14</sup>. These cells were cultured in DMEM (D6429, Sigma-Aldrich) supplemented  
228 with 5% FBS (#35-150-CV, Corning), 2 mM L-glutamine (G7513, Sigma-Aldrich), and  
229 penicillin/streptomycin (P0781, Sigma-Aldrich). Cells were passaged using trypsin (T4049,  
230 Sigma-Aldrich) every 3-4 days.

231

### 232 **Compounds**

233 Small molecule CP35 was purchased from ChemBridge (#7658470). Small molecule CP68 was  
234 purchased from ChemDiv (#5353-0933). Etoposide was purchased from Sigma-Aldrich (#E1383-  
235 100MG). CD437 was purchased from Sigma-Aldrich (#C5865). MLN4924 was purchased from  
236 ApexBio (#B1036). Rigosertib was purchased from Cayman Chemical (#15553). Colchicine was  
237 purchased from Sigma-Aldrich (#C9754-100MG). YK-4-279 was purchased from Selleck  
238 Chemicals (#S7679). TK216 was purchased from MedChem Express (#HY-122903). TK216  
239 enantiomers were separated and purified by Lotus Separations. SFC (supercritical fluid  
240 chromatography) separation of 29 mg racemic TK216 yielded 14 mg of (+)-TK216 and 14 mg of  
241 (-)-TK216. The separation method used was: AS-H (2 x 25 cm), 35% ethanol/CO<sub>2</sub> (100 bar), 50  
242 mL/min, 220 nm. Injected volume 1 mL, 2 mg/mL methanol:DCM. YK-4-279, TK216, and both  
243 TK216 enantiomers exhibited between 98 and 99% purity as determined by LC-MS analysis  
244 performed on an Agilent 1290 HPLC system using an Eclipse XDB-C18 column (46 X 150 mm, 5  
245 μm); Agilent) that was coupled to an Agilent 6130 mass spectrometer run in ESI mode in both

246 positive and negative ionization with a scan range of 100-1,100 m/z. Liquid chromatography was  
247 carried out at a flow rate of 0.5 mL/min at 20 °C with a 5 µL injection volume, using the gradient  
248 elution with aqueous acetonitrile containing 0.1% formic acid. The gradient was adjusted based  
249 on the different polarity of different compounds. All compounds were diluted in DMSO (Sigma-  
250 Aldrich, D650-100ML). HPLC chromatograms for all compounds used in the study shown in  
251 Figure S5.

252

### 253 **Forward Genetic Screen of TK216**

254 Previously described mismatch-repair deficient EWS cells, A673-M1, were utilized. We first  
255 identified the concentration of TK216 that killed 100% of MMR-deficient and -proficient A673 cells  
256 after 1 week of compound exposure ( $IC_{100}^{1wk}$ ).  $IC_{100}^{1wk}$  determination for TK216 was performed  
257 in a 12-well plate seeding 25,000 cells per well. After 24h, TK216 was dispensed using TECAN  
258 D300e setting up a minimum concentration of  $IC_{50}^{72h}$  and a maximum concentration of  $IC_{100}^{72h}$ .  
259 Media and TK216 were replenished after 3-4 days. After 7 days, cell viability was determined  
260 visually to determine  $IC_{100}^{1wk}$ . Then, A673-M1 cells and A673 parental cells were plated in 5 x  
261 10cm plates for each cell line (1 million cells per plate). The following day, TK216 was added at  
262 5 different concentrations:  $IC_{100}^{1wk} \div 1.5$  (0.66 µM),  $IC_{100}^{1wk} \div 1.25$  (0.78 µM),  $IC_{100}^{1wk}$  (0.98 µM),  
263  $IC_{100}^{1wk} \times 1.25$  (1.22 µM), and  $IC_{100}^{1wk} \times 1.5$  (1.48 µM) to the plates. Media with TK216 was  
264 replenished every 3 – 4 days over the course of 2 weeks. Surviving clones were expanded.

265

### 266 **Whole Exome Sequencing Analysis**

267 Trim Galore ([https://www.bioinformatics.babraham.ac.uk/projects/trim\\_galore/](https://www.bioinformatics.babraham.ac.uk/projects/trim_galore/)) was used for  
268 quality and adapter trimming. The human reference genome sequence and gene annotation data,  
269 hg38, were downloaded from Illumina iGenomes  
270 ([https://support.illumina.com/sequencing/sequencing\\_software/igenome.html](https://support.illumina.com/sequencing/sequencing_software/igenome.html)). The sequencing  
271 reads were aligned to the genome sequence using Burrows-Wheeler Aligner (BWA, v0.7.17) <sup>26</sup>.

272 Picard (2.21.3) (<https://broadinstitute.github.io/picard>) was used to remove PCR duplicates and  
273 Genome Analysis Toolkit (GATK, 4.1.4.0)<sup>27,28</sup> was used to recalibrate base qualities. Calling  
274 variants and genotyping were performed using GATK HaplotypeCaller and the variant calls were  
275 filtered by applying the following criteria: QD (Variant Confidence/Quality by Depth) < 2, FS  
276 (Phred-scaled p-value using Fisher's exact test to detect strand bias) > 60, MQ (RMS Mapping  
277 Quality) < 40, DP (Approximate read depth) < 3, GQ (Genotype Quality) < 7. Custom Perl scripts  
278 (<https://github.com/jiwoongbio/Annomen>) were used to annotate variants with human transcripts,  
279 proteins, and variations (RefSeq and dbSNP build 151) and calculate variant allele frequencies.  
280 We defined acquired somatic mutations for each A673-M1 TK216-resistant clones by VAF > 0.2  
281 and VAF < 0.01 for the parental A673-M1 cell line and VAF < 0.05 for previously reported MLN-  
282 resistant clones<sup>11</sup>. Non-coding mutations were excluded from the analysis.

283

#### 284 **Introduction of *TUBA1B* Mutations**

285 We performed homology-directed repair using Alt-R CRISPR-Cas9 System and ultramer oligo  
286 from Integrated DNA Technologies (IDT) in A673 EWS cells. To prepare the gRNA complex for  
287 *TUBA1B*<sup>G142</sup> and *TUBA1B*<sup>D47</sup>, we combined 10 µL of Alt-R CRISPR-Cas9 crRNA (100 µM)  
288 (*TUBA1B*<sup>G142</sup> sequence: 5'-UUC UUG GUU UUC CAC AGC UUG UUU UAG AGC UAU GCU-3';  
289 *TUBA1B*<sup>D47</sup> sequence: 5'-CUC ACU GAA GAA GGU GUU GAG UUU UAG AGC UAU GCU-3')  
290 and 10 µL Alt-R CRISPR-Cas9 tracrRNA (100 µM). The mixture was heated to 95°C for 5  
291 minutes, then allowed to slowly cool to room temperature. Ribonucleoprotein complex with Cas9  
292 was formed by combining 3 µL of gRNA complex with 2 µL Alt-R Cas9 enzyme and incubating at  
293 RT for 10-20 minutes. Two million A673 cells were resuspended in 120 µL of SF Cell Line 4D-  
294 Nucleofector™ X Kit L (Cat. #: V4XC-3024). The transfection mix was prepared using: 15 µL of  
295 RNP complex, 3.6 µL of 100 µM Ultramer ssODN donor (*TUBA1B*<sup>G142S</sup> sequence: 5'-A\*C\*C AGT  
296 GCA CCG GTC TTC AGG GCT TCT TGG TTT TCC ACA GCT TTA GTG GGG GAA CTG GTT  
297 CTG GGT TCA CCT CCC TGC TCA TG\*G\*A-3'; *TUBA1B*<sup>G142A</sup> sequence: 5'-A\*C\*C AGT GCA

298 CCG GTC TTC AGG GCT TCT TGG TTT TCC ACA GCT TTG CTG GGG GAA CTG GTT CTG  
299 GGT TCA CCT CCC TGC TCA TG G\*A\*A-3'; *TUBA1B*<sup>D47H</sup> sequence: T\*G\*G CCA GAT GCC  
300 AAG TGA CAA GAC CAT TGG GGG AGG AGA TGC CTC CTT CAA CAC ATT CTT CAG TGA  
301 GAC GGG CGC TGG CAA GCA CGT GCC CCG GGC T\*G\*T; *TUBA1B*<sup>D47G</sup> sequence: T\*G\*G  
302 CCA GAT GCC AAG TGA CAA GAC CAT TGG GGG AGG AGA TCA CTC CTT CAA CAC ATT  
303 CTT CAG TGA GAC GGG CGC TGG CAA GCA CGT GCC CCG GGC T\*G\*T) and added to 60  
304  $\mu$ L of previously prepared cell suspension. Nucleofection was performed using 4D-Nucleofector™  
305 core unit from LONZA. Cells were plated into one well of a 6-w plate after nucleofection in 2 mL  
306 of RPMI (10% FBS). After one week, sham cells or ssODN (*TUBA1B*<sup>G142S/A</sup>) cells were plated into  
307 10 cm dishes. Each sample was plated into three 10cm dishes using 1 million cells per dish.  
308 *TUBA1B*<sup>G142S/A</sup> cells were treated with TK216 at concentrations: 0.75 / 1 / 1.25  $\mu$ M. Media and  
309 small molecules were replenished every 3 – 4 days over the course of 2 weeks followed by  
310 expansion in media without compound for 1 week. A673-*TUBA1B*<sup>G142S/A</sup> and -*TUBA1B*<sup>D47H/G</sup> cells  
311 were stained with crystal violet staining solution prepared with 1% (weight/volume ratio) crystal  
312 violet from Sigma-Aldrich (#C6158-50G) in 10% ethanol. After TK216 selection, one dish with  
313 A673-*TUBA1B*<sup>G142S</sup>, -*TUBA1B*<sup>G142A</sup>, and -*TUBA1B*<sup>D47H</sup> cells were expanded to performed DRC to  
314 validate compound resistance.

315

### 316 **Cytotoxic Assay**

317 For mouse SCLC, 518T2, cells were seeded in duplicates in 96-well plates, 10,000 cells and 200  
318  $\mu$ L of DMEM media (5% FBS) per well. For human EWS, A673, cells were seeded in duplicate in  
319 96-well plates, 3,000 cells and 200  $\mu$ L of RPMI media (10% FBS) per well. After overnight  
320 incubation, compounds were dispensed using a D300e Digital Dispenser (TECAN) in 15-point  
321 dose response manner using a maximum and minimum concentration of 50  $\mu$ M and 1.58 nM,  
322 respectively. Cell viability was assessed after 72 hours using CellTiter-Glo luminescent cell  
323 viability assay (Promega, #G7571). The CellTiter-Glo reagent was diluted by adding PBS-Triton-

324 X (1%) (1:1 ratio). Each value was normalized to cells treated with DMSO, and the IC50 values  
325 were calculated using GraphPad Prism software.

326

### 327 **MT Polymerization Assay**

328 We used cycled-tubulin purchased from PurSolutions (Cat. #: 032005). MT polymerization occurs  
329 spontaneously upon incubation of cycled-tubulin in PEM buffer with GTP at 37 Celsius. Each  
330 condition was performed in triplicate from a 384-well plate. First, the 384-well plate was  
331 prewarmed at 37 Celsius using plate reader Synergy2 (Biotek). Master mix containing cycled-  
332 tubulin, PEM buffer and GTP was prepared for the samples analyzed in an Eppendorf tube: 2.5  
333  $\mu$ g of cycled-tubulin (20 mg/mL), (5X) PEM buffer (400 mM PIPES, 5 mM EGTA, 5 mM MgCl<sub>2</sub>,  
334 pH = 6.8), DTT (1 mM), GTP (1 mM), DMSO (3%), and ddH<sub>2</sub>O up to 30  $\mu$ L per reaction and  
335 incubated on ice 3-5 minutes. After incubation, 30  $\mu$ L of the master mix was added per well in a  
336 384-well plate. Immediately after compounds were added at desired concentration using a D300e  
337 Digital Dispenser (TECAN). Absorbance at 340 nm was measured immediately after every 15  
338 seconds for 20 minutes.

339

### 340 **Cell-based Tubulin Competition Assay**

341 Murine SCLC cells, 518T2, were seeded in 12-w plates (1 million cells per well) with 1 mL DMEM  
342 media (5% FBS) each well. Human EWS cells, A673, were seeded in 12-w plates (0.5 million  
343 cells per well) with 1 mL RPMI media (10% FBS) each well. Small molecules were dispensed 24-  
344 hours later at increasing concentrations using a D300e Digital Dispenser (TECAN) in 10-point  
345 dose response manner using a maximum and minimum concentration of 50  $\mu$ M and 100 nM.  
346 Following 30 minutes incubation at 37 °C in 5% CO<sub>2</sub>, tubulin covalent probe was dispensed at 5  
347  $\mu$ M in 11 wells. After 30 minutes incubation, cells were washed gently with PBS and then lysed in  
348 1% SDS Buffer A (50 mM HEPES pH 7.4, 10 mM KCl, 2 mM MgCl<sub>2</sub>), freshly supplemented with  
349 1:10,000 benzonase (Sigma-Aldrich). After incubation, copper-mediated click chemistry with a

350 fluorescent azide was performed. Covalently modified  $\beta$ -tubulin was visualized by SDS-PAGE  
351 and scanning gels for fluorescence<sup>14</sup>.

352

353 **Data availability**

354 WES data for samples TK216 clones are accessible at SRA accession number: PRJNA770630



355 **OLIGONUCLEOTIDE TABLE**

| Name                                | Sequence (5'→3')                                                                                           |
|-------------------------------------|------------------------------------------------------------------------------------------------------------|
| <b>TUBA1B<sup>G142</sup> crRNA</b>  | UUUCUUGGUUUUCCACAGCUUGUUUUAGAGCUAUGCU                                                                      |
| <b>TUBA1B<sup>D47</sup> crRNA</b>   | CUCACUGAAGAAGGUGUUGAGUUUUAGAGCUAUGCU                                                                       |
| <b>ssODN TUBA1B<sup>G142S</sup></b> | A*C*CAGTGCACCGGTCTTCAGGGCTTCTTGTTTTCCACAGCTTTAGTGGGG<br>GAACTGGTTCTGGGTTACCTCCCTGCTCATG*G*A                |
| <b>ssODN TUBA1B<sup>G142A</sup></b> | A*C*CAGTGCACCGGTCTTCAGGGCTTCTTGTTTTCCACAGCTTTGCTGGG<br>GAACTGGTTCTGGGTTACCTCCCTGCTCATGG*A*A                |
| <b>ssODN TUBA1B<sup>D47H</sup></b>  | T*G*GCCAGATGCCAAGTGACAAGACCATTGGGGGAGGAGATGCCTCCTTCA<br>ACACATTCTTCAGTGAGACGGGCGCTGGCAAGCACGTGCCCGGGCT*G*T |
| <b>ssODN TUBA1B<sup>D47G</sup></b>  | T*G*GCCAGATGCCAAGTGACAAGACCATTGGGGGAGGAGATCACTCCTTCAA<br>CACATTCTTCAGTGAGACGGGCGCTGGCAAGCACGTGCCCGGGCT*G*T |
| <b>TUBA1B<sup>G142</sup> amp.Fw</b> | AAG CTG AAA TTC TGG GAG CAT G                                                                              |
| <b>TUBA1B<sup>G142</sup> amp.Rv</b> | ATG TGG AAT AGG CTG CTT GC                                                                                 |
| <b>TUBA1B<sup>G142</sup> seq.Fw</b> | AAT GGA GAA CTC CAG CTT GG                                                                                 |
| <b>TUBA1B<sup>D47</sup> amp.Fw</b>  | CAG TGC GAA CTT CAT CTG GAG                                                                                |
| <b>TUBA1B<sup>D47</sup> amp.Rv</b>  | CTG GGC GAC AGA CCT TAT CTC                                                                                |
| <b>TUBA1B<sup>D47</sup> seq.Fw</b>  | TGC ATC TCC ATC CAC GTT GG                                                                                 |

356

357 Oligonucleotides used for introducing TUBA1B mutations in EWS cells. Primers used to amplify

358 TUBA1B regions to sequence the knocked-in mutations.

359 **FIGURE LEGENDS**

360 **Figure 1. Forward genetic screening for TK216 resistance identifies *TUBA1B* mutations**

361 **sufficient to confer resistance to YK-4-279/TK216.** (A) Workflow for forward genetic screening

362 using Msh2-null EWS cells, A673-M1 cells. Dose-response curves for TK216 (B) and MLN4924

363 (C) against parental Msh2-null EWS cells, A673-M1, and compound resistant clones. Dose-

364 response curves were performed at least twice for each compound and in duplicate per

365 concentration. (D) Table with half-maximal inhibitory concentrations (IC<sub>50</sub>) for TK216 against

366 parental Msh2-null EWS cells, A673-M1, and compound resistant clones. (E) *TUBA1B* is one of

367 the two genes recurrently mutated in four out of six clones. (F) Crystal structure of  $\alpha$ -/ $\beta$ -tubulin

368 (PDB: 1Z2B). Highlighted in red are both mutated codons, G142 and D47, found in EWS TK216-

369 resistant cells. (G) Crystal violet staining of EWS cells edited in *TUBA1B* harboring D47G/H or

370 G142S/A mutations. (H-J) Dose-response curves for TK216 against EWS cells harboring

371 *TUBA1B*<sup>G142A</sup>, *TUBA1B*<sup>G142S</sup>, and *TUBA1B*<sup>D47H</sup> mutations. (K-M) Dose-response curves for (-)-

372 TK216 against EWS cells harboring *TUBA1B*<sup>G142A</sup>, *TUBA1B*<sup>G142S</sup>, and *TUBA1B*<sup>D47H</sup> mutations.

373 Dose-response curves were performed at least twice for each compound and in duplicate per

374 concentration.

375

376 **Figure 2. YK-4-279 and TK216 binds at the colchicine site and inhibit MT polymerization *in***

377 ***vitro*.** (A) Assessing MT polymerization after addition of DMSO, CD437, YK-4-279, TK216, or

378 colchicine at 5  $\mu$ M. (B) Dose dependent inhibition of MT polymerization upon TK216 treatment at

379 0.5  $\mu$ M, 2  $\mu$ M, 5  $\mu$ M, 20  $\mu$ M, and 50  $\mu$ M. (C) Inhibition of MT polymerization by (-)-TK216

380 enantiomer compared to inactive (+)-TK216 enantiomer. All samples were performed in

381 triplicates. (D) Cell-based competition assay using covalent  $\beta$ -tubulin probe to assess tubulin

382 binding by compounds, colchicine, CD437, YK-4-279, TK216, (+)-TK216, and (-)-TK216.

383 **REFERENCES**

- 384 1 Riggi, N., Suva, M. L. & Stamenkovic, I. Ewing's Sarcoma. *N Engl J Med* **384**, 154-164,  
385 doi:10.1056/NEJMra2028910 (2021).
- 386 2 Erkizan, H. V. *et al.* A small molecule blocking oncogenic protein EWS-FLI1 interaction  
387 with RNA helicase A inhibits growth of Ewing's sarcoma. *Nat Med* **15**, 750-756,  
388 doi:10.1038/nm.1983 (2009).
- 389 3 Zollner, S. K. *et al.* Inhibition of the oncogenic fusion protein EWS-FLI1 causes G2-M cell  
390 cycle arrest and enhanced vincristine sensitivity in Ewing's sarcoma. *Sci Signal* **10**,  
391 doi:10.1126/scisignal.aam8429 (2017).
- 392 4 Ludwig, J. A. *et al.* TK216 for relapsed/refractory Ewing sarcoma: Interim phase 1/2  
393 results. *Journal of Clinical Oncology* **39**, 11500-11500,  
394 doi:10.1200/JCO.2021.39.15\_suppl.11500 (2021).
- 395 5 Huang, L. *et al.* Targeting Pan-ETS Factors Inhibits Melanoma Progression. *Cancer Res*  
396 **81**, 2071-2085, doi:10.1158/0008-5472.CAN-19-1668 (2021).
- 397 6 Kollareddy, M. *et al.* The small molecule inhibitor YK-4-279 disrupts mitotic progression of  
398 neuroblastoma cells, overcomes drug resistance and synergizes with inhibitors of mitosis.  
399 *Cancer Lett* **403**, 74-85, doi:10.1016/j.canlet.2017.05.027 (2017).
- 400 7 Rahim, S. *et al.* A small molecule inhibitor of ETV1, YK-4-279, prevents prostate cancer  
401 growth and metastasis in a mouse xenograft model. *PLoS One* **9**, e114260,  
402 doi:10.1371/journal.pone.0114260 (2014).
- 403 8 Spriano, F. *et al.* The ETS Inhibitors YK-4-279 and TK-216 Are Novel Antilymphoma  
404 Agents. *Clin Cancer Res* **25**, 5167-5176, doi:10.1158/1078-0432.CCR-18-2718 (2019).
- 405 9 Xue, J. *et al.* The ETS Inhibitor YK-4-279 Suppresses Thyroid Cancer Progression  
406 Independent of TERT Promoter Mutations. *Front Oncol* **11**, 649323,  
407 doi:10.3389/fonc.2021.649323 (2021).

- 408 10 Hu, H. M. *et al.* EWS/FLI1 suppresses retinoblastoma protein function and senescence in  
409 Ewing's sarcoma cells. *J Orthop Res* **26**, 886-893, doi:10.1002/jor.20597 (2008).
- 410 11 Povedano, J. M. *et al.* Engineering Forward Genetics into Cultured Cancer Cells for  
411 Chemical Target Identification. *Cell Chem Biol* **26**, 1315-1321 e1313,  
412 doi:10.1016/j.chembiol.2019.06.006 (2019).
- 413 12 Han, T. *et al.* The antitumor toxin CD437 is a direct inhibitor of DNA polymerase alpha.  
414 *Nat Chem Biol* **12**, 511-515, doi:10.1038/nchembio.2082 (2016).
- 415 13 Han, T. *et al.* Anticancer sulfonamides target splicing by inducing RBM39 degradation via  
416 recruitment to DCAF15. *Science* **356**, doi:10.1126/science.aal3755 (2017).
- 417 14 Povedano, J. M. *et al.* A Multipronged Approach Establishes Covalent Modification of  
418 beta-Tubulin as the Mode of Action of Benzamide Anti-cancer Toxins. *J Med Chem* **63**,  
419 14054-14066, doi:10.1021/acs.jmedchem.0c01482 (2020).
- 420 15 Han, T. & Nijhawan, D. Exome Sequencing of Drug-Resistant Clones for Target  
421 Identification. *Methods Mol Biol* **1888**, 175-187, doi:10.1007/978-1-4939-8891-4\_10  
422 (2019).
- 423 16 Ma, C. *et al.* Secondary mutations correct fitness defects in *Toxoplasma gondii* with  
424 dinitroaniline resistance mutations. *Genetics* **180**, 845-856,  
425 doi:10.1534/genetics.108.092494 (2008).
- 426 17 Barber-Rotenberg, J. S. *et al.* Single enantiomer of YK-4-279 demonstrates specificity in  
427 targeting the oncogene EWS-FLI1. *Oncotarget* **3**, 172-182, doi:10.18632/oncotarget.454  
428 (2012).
- 429 18 Brouhard, G. J. & Rice, L. M. Microtubule dynamics: an interplay of biochemistry and  
430 mechanics. *Nat Rev Mol Cell Biol* **19**, 451-463, doi:10.1038/s41580-018-0009-y (2018).
- 431 19 Florian, S. & Mitchison, T. J. Anti-Microtubule Drugs. *Methods Mol Biol* **1413**, 403-421,  
432 doi:10.1007/978-1-4939-3542-0\_25 (2016).

- 433 20 Aoyama, A. *et al.* Tivantinib (ARQ 197) exhibits antitumor activity by directly interacting  
434 with tubulin and overcomes ABC transporter-mediated drug resistance. *Mol Cancer Ther*  
435 **13**, 2978-2990, doi:10.1158/1535-7163.MCT-14-0462 (2014).
- 436 21 Jost, M. *et al.* Combined CRISPRi/a-Based Chemical Genetic Screens Reveal that  
437 Rigosertib Is a Microtubule-Destabilizing Agent. *Mol Cell* **68**, 210-223 e216,  
438 doi:10.1016/j.molcel.2017.09.012 (2017).
- 439 22 Jost, M. *et al.* Pharmaceutical-Grade Rigosertib Is a Microtubule-Destabilizing Agent. *Mol*  
440 *Cell* **79**, 191-198 e193, doi:10.1016/j.molcel.2020.06.008 (2020).
- 441 23 Xiang, Q. *et al.* Tivantinib induces G2/M arrest and apoptosis by disrupting tubulin  
442 polymerization in hepatocellular carcinoma. *J Exp Clin Cancer Res* **34**, 118,  
443 doi:10.1186/s13046-015-0238-2 (2015).
- 444 24 Selvanathan, S. P. *et al.* Oncogenic fusion protein EWS-FLI1 is a network hub that  
445 regulates alternative splicing. *Proc Natl Acad Sci U S A* **112**, E1307-1316,  
446 doi:10.1073/pnas.1500536112 (2015).
- 447 25 McLoughlin, E. C. & O'Boyle, N. M. Colchicine-Binding Site Inhibitors from Chemistry to  
448 Clinic: A Review. *Pharmaceuticals (Basel)* **13**, doi:10.3390/ph13010008 (2020).
- 449 26 Li, H. & Durbin, R. Fast and accurate short read alignment with Burrows-Wheeler  
450 transform. *Bioinformatics* **25**, 1754-1760, doi:10.1093/bioinformatics/btp324 (2009).
- 451 27 DePristo, M. A. *et al.* A framework for variation discovery and genotyping using next-  
452 generation DNA sequencing data. *Nat Genet* **43**, 491-498, doi:10.1038/ng.806 (2011).
- 453 28 McKenna, A. *et al.* The Genome Analysis Toolkit: a MapReduce framework for analyzing  
454 next-generation DNA sequencing data. *Genome Res* **20**, 1297-1303,  
455 doi:10.1101/gr.107524.110 (2010).

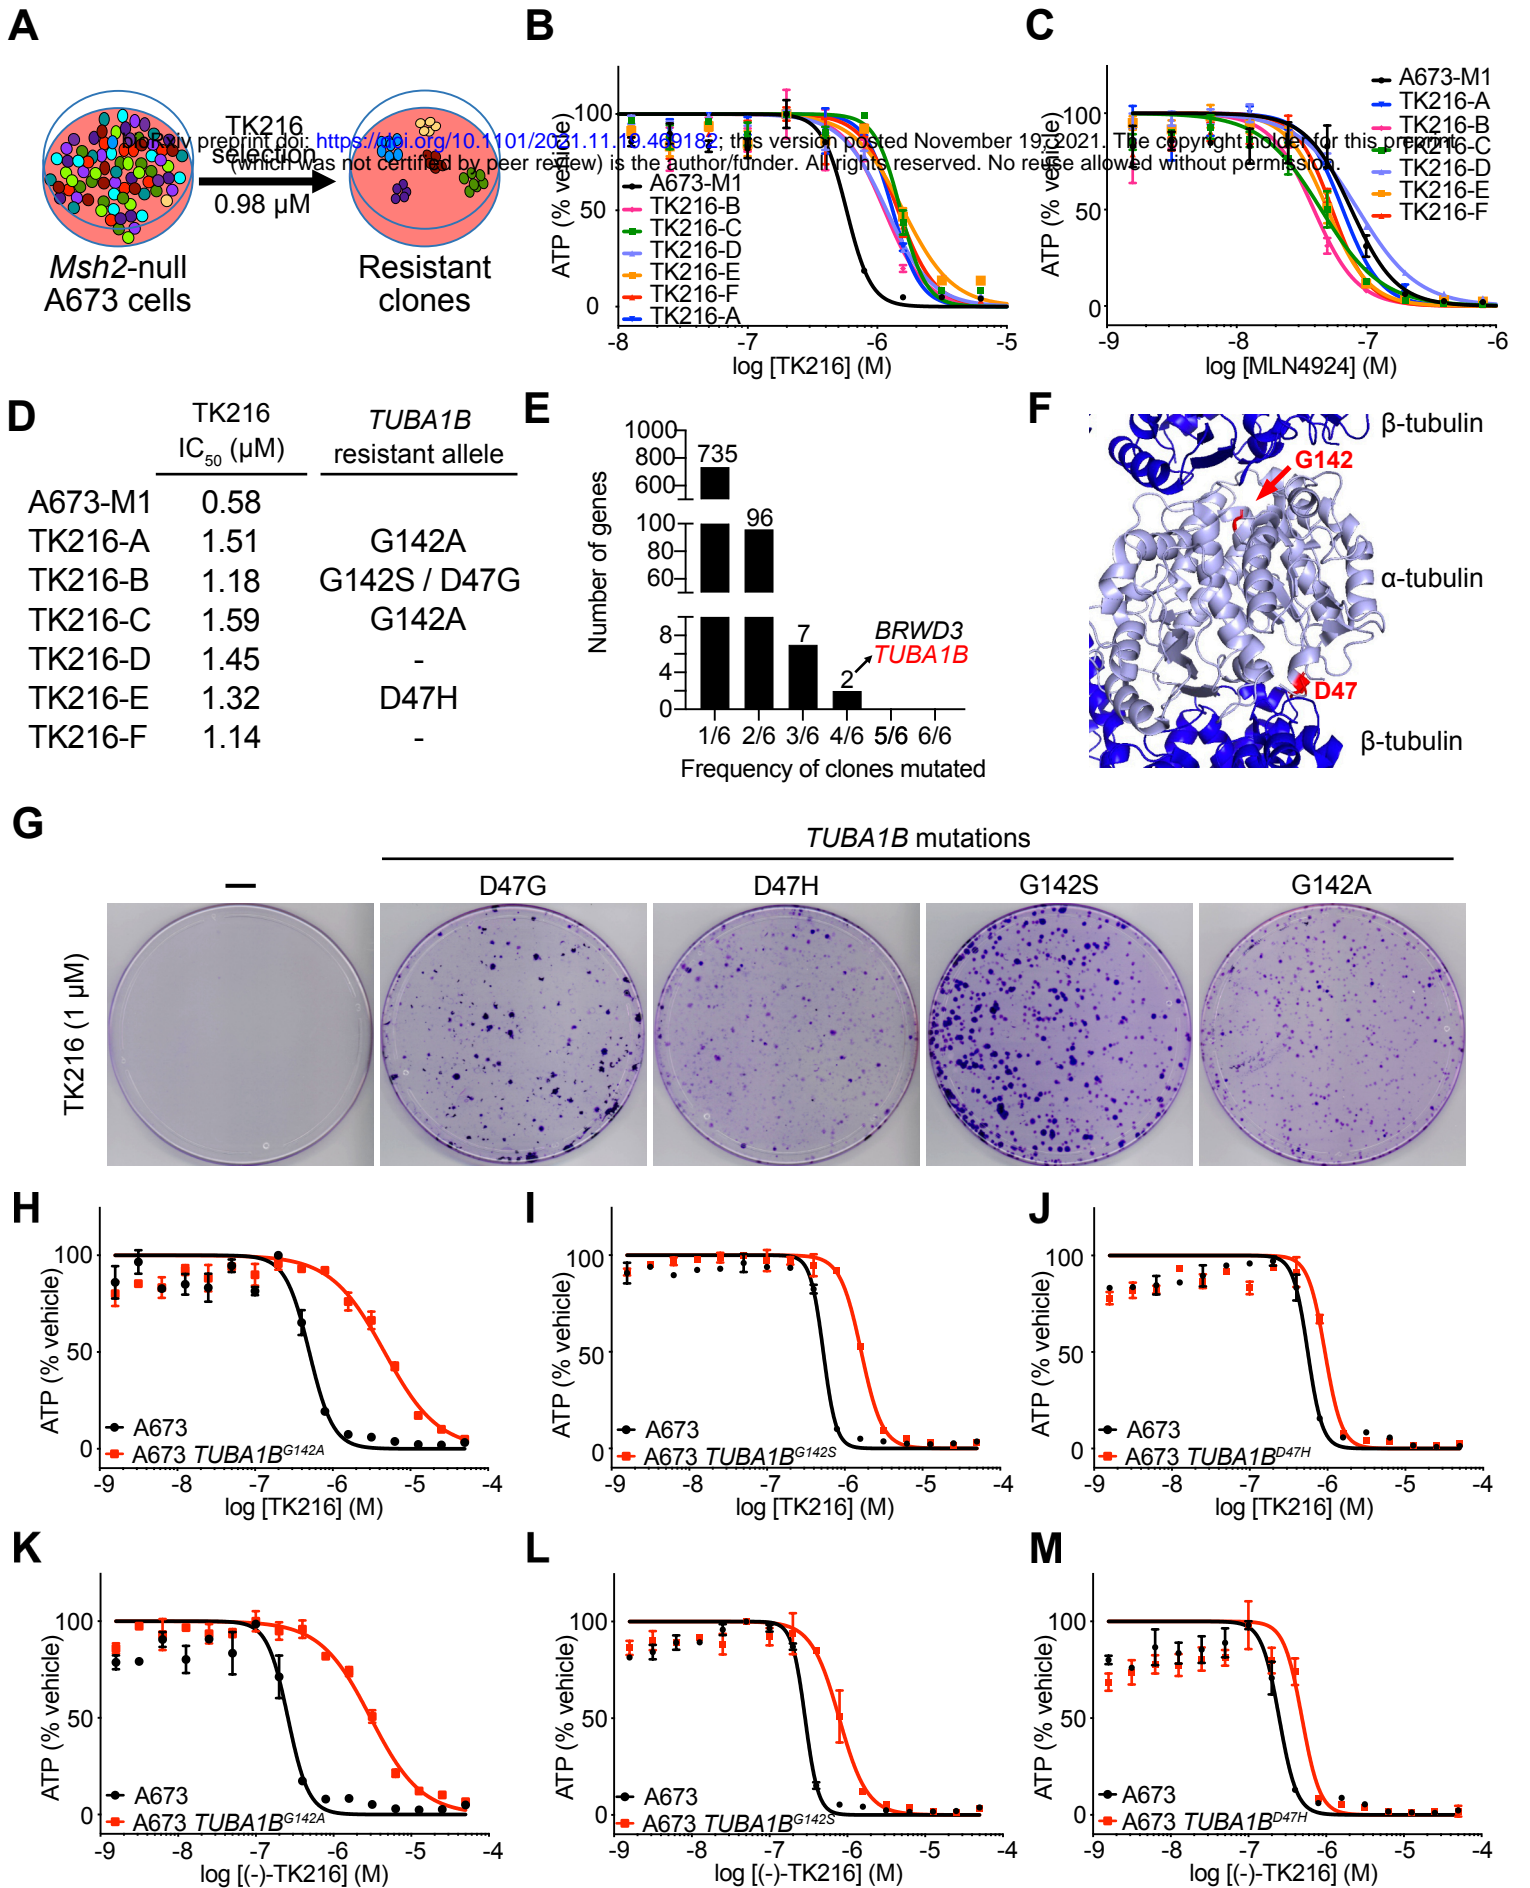

**Figure 1. Forward genetic screening for TK216 resistance identifies *TUBA1B* mutations sufficient to confer resistance to YK-4-279/TK216.**

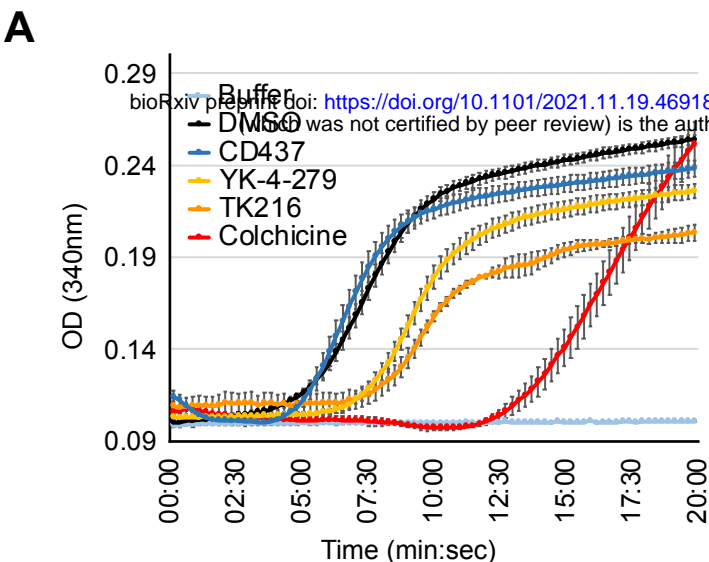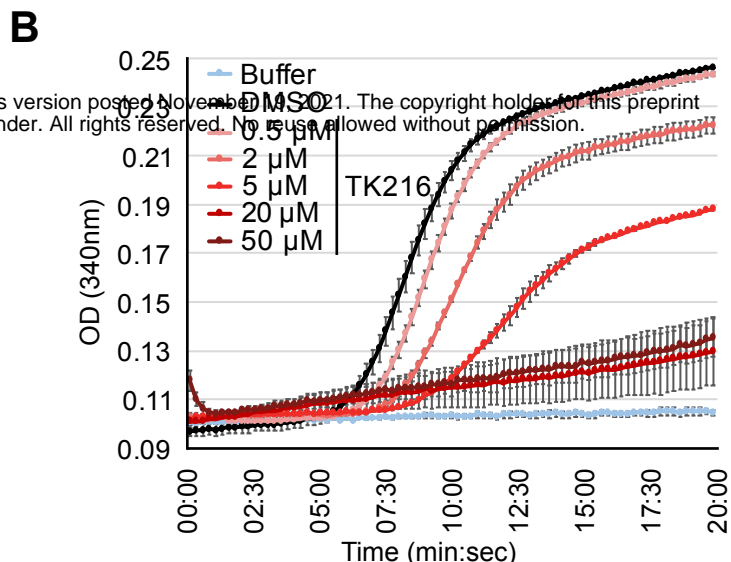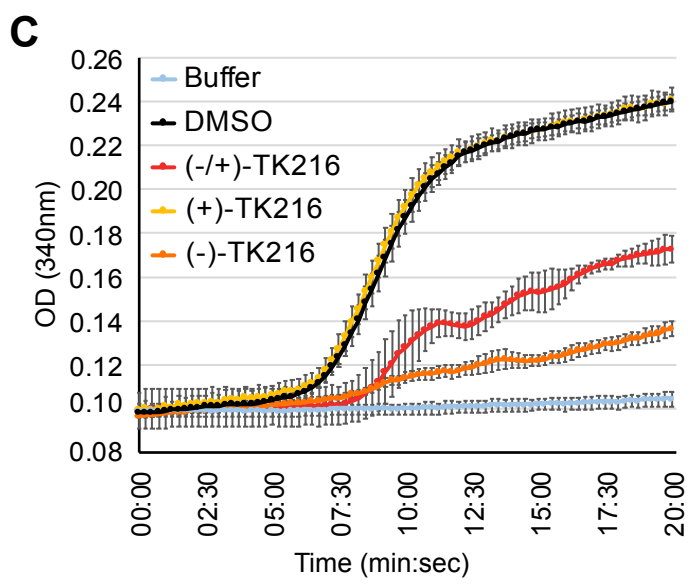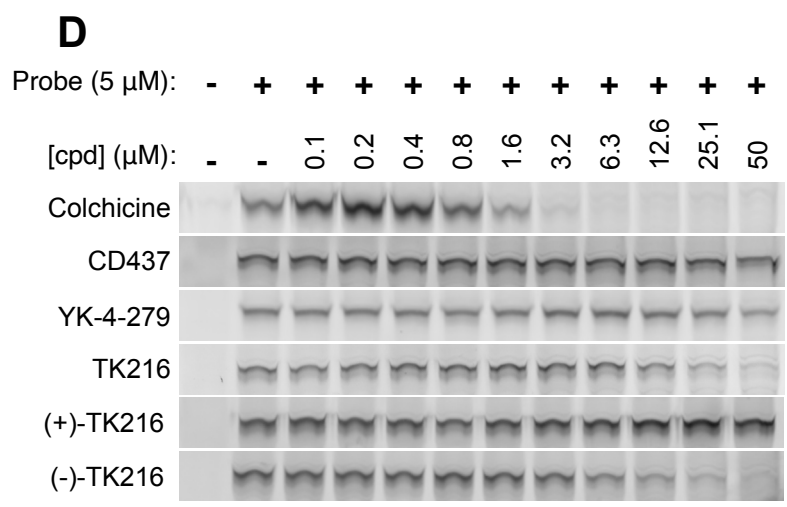

**Figure 2. YK-4-279 and TK216 binds at the colchicine site and inhibit MT polymerization *in vitro*.**

**A**

bioRxiv preprint doi: <https://doi.org/10.1101/2021.11.19.469182>; this version posted November 19, 2021. The copyright holder for this preprint (which was not certified by peer review) is the author/funder. All rights reserved. No reuse allowed without permission.

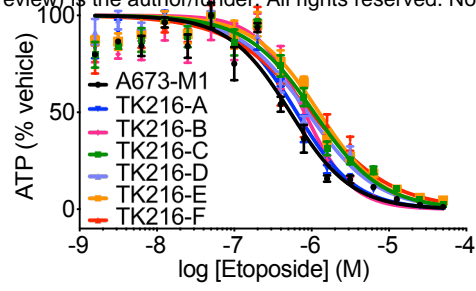

**Supplementary Figure 1.** (A) Dose-response curve for etoposide against A673-M1, Msh2-null EWS cells, and TK216 resistant clones.



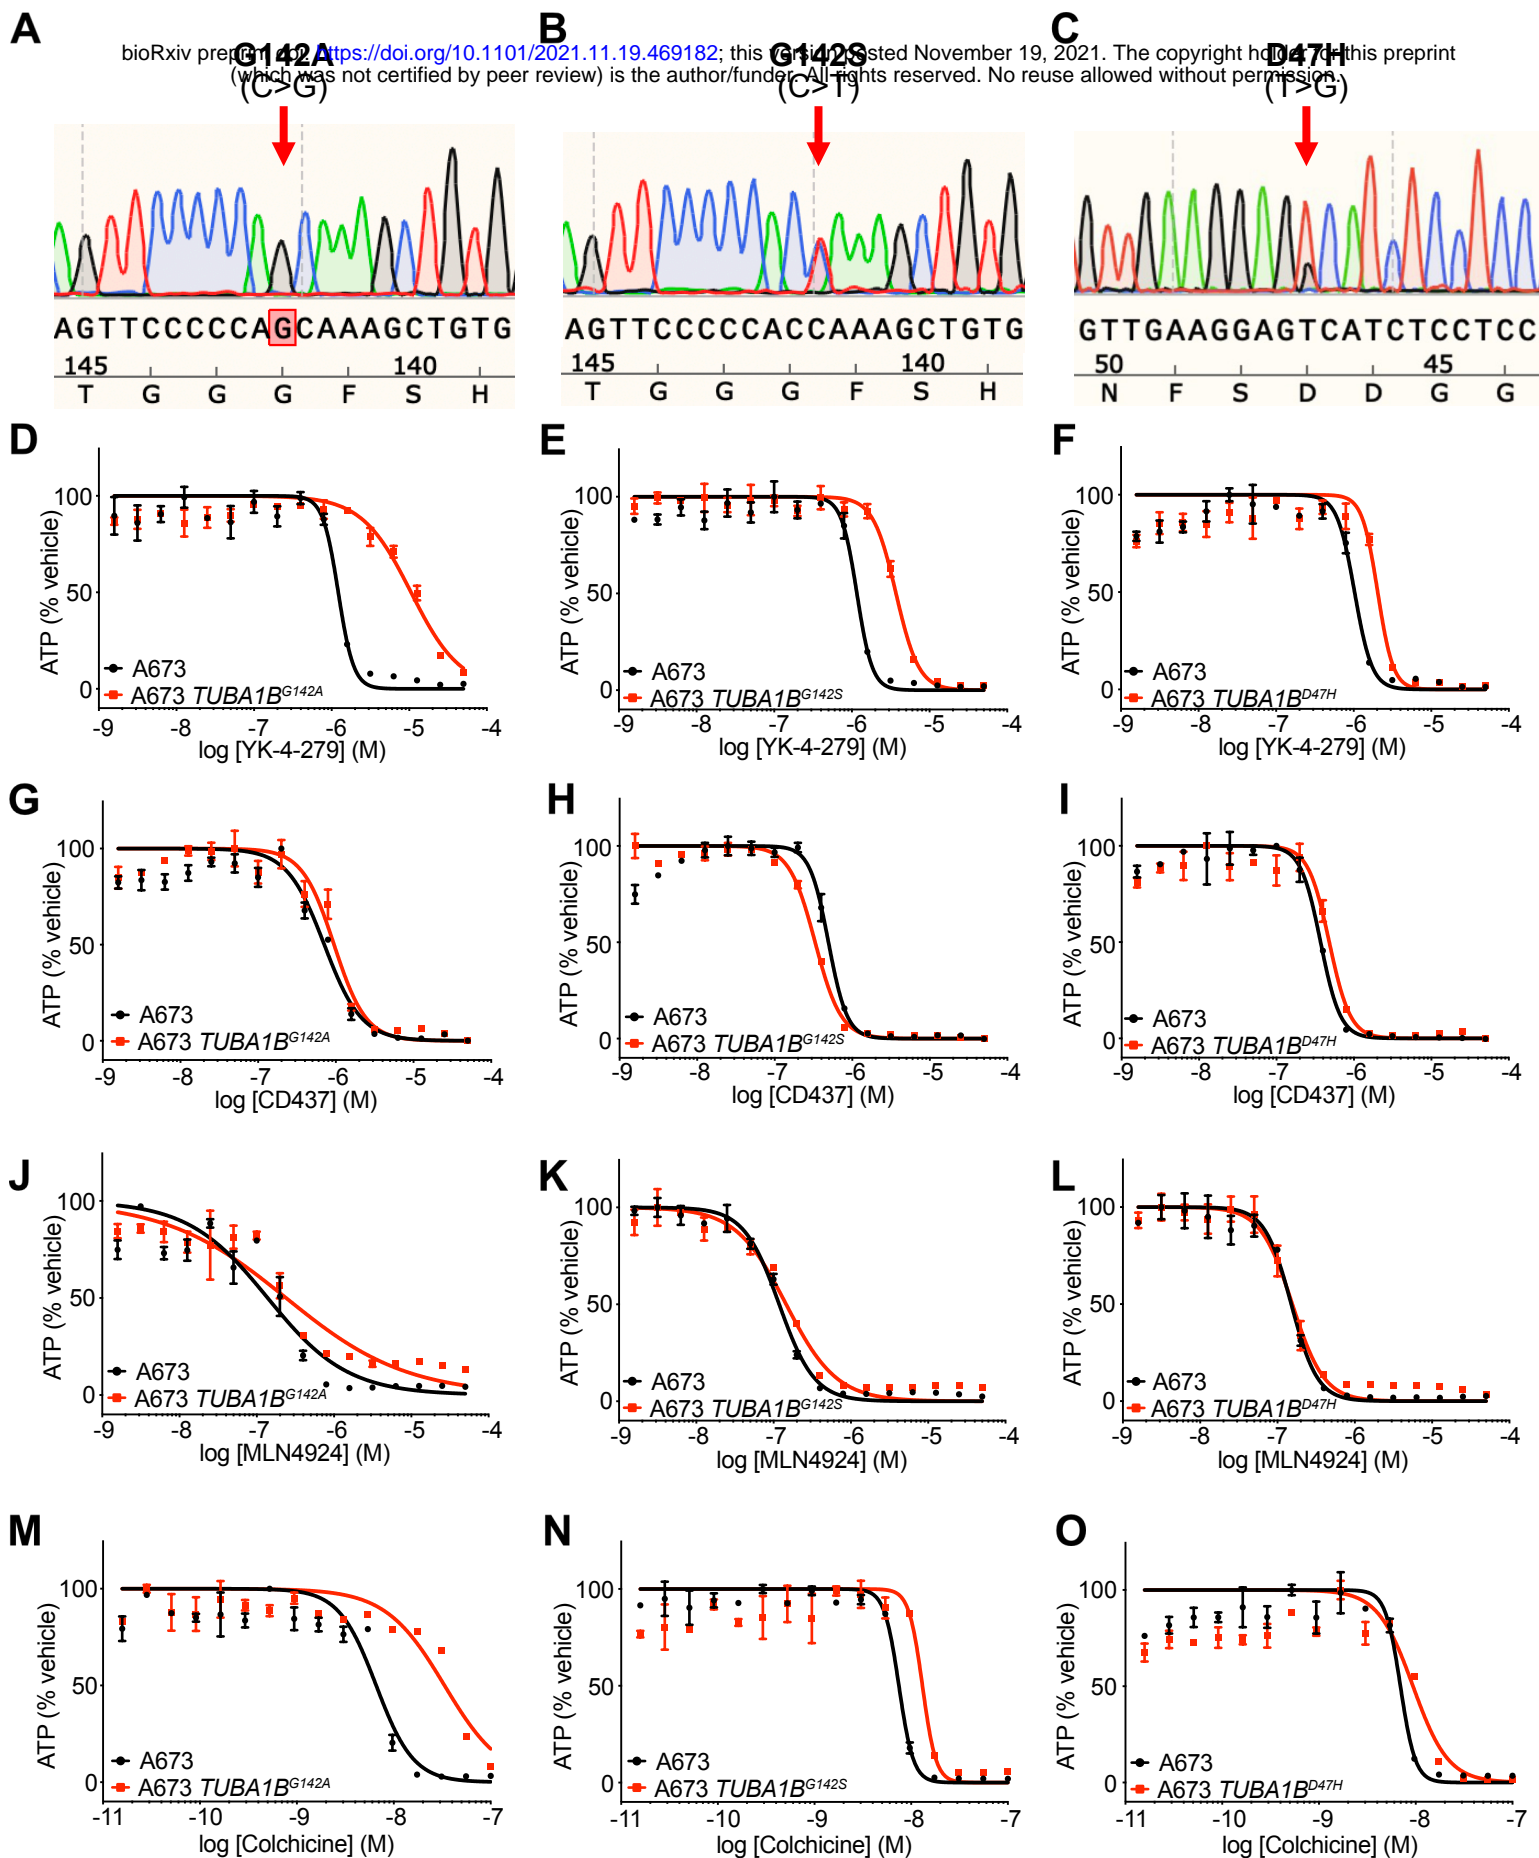

**Supplementary Figure 2.** (A,B,C) Sequencing traces for TUBA1B<sup>G142A</sup>, TUBA1B<sup>G142S</sup>, and TUBA1B<sup>D47H</sup> mutations in EWS cells. (D,G,J,M) Dose-response curves for, YK-4-279 (D), CD437 (G), MLN4924 (J), colchicine (M) against EWS cells harboring TUBA1B<sup>G142A</sup> mutation. (E,H,K,N) Dose-response curves for, YK-4-279 (E), CD437 (H), MLN4924 (K), colchicine (N) against EWS cells harboring TUBA1B<sup>G142S</sup> mutation. (F,I,L,O) Dose-response curves for, YK-4-279 (F), CD437 (I), MLN4924 (L), colchicine (O) against EWS cells harboring TUBA1B<sup>D47H</sup> mutation.

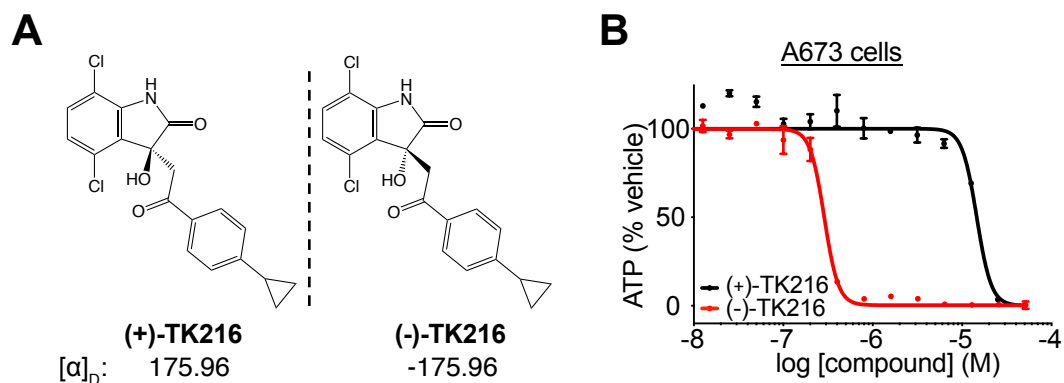

**Supplementary Figure 3.** (A) Chemical structure and specific rotation ( $[\alpha]_D$ ) of each TK216 enantiomer. (B) Dose-response curve for (-)-TK216 and (+)-TK216, against EWS A673 cells. Densitometry graphs under gels were generated using ImageJ to measure intensity of  $\beta$ -tubulin band. Densitometry data were normalized to the control no competitor plus probe lane.

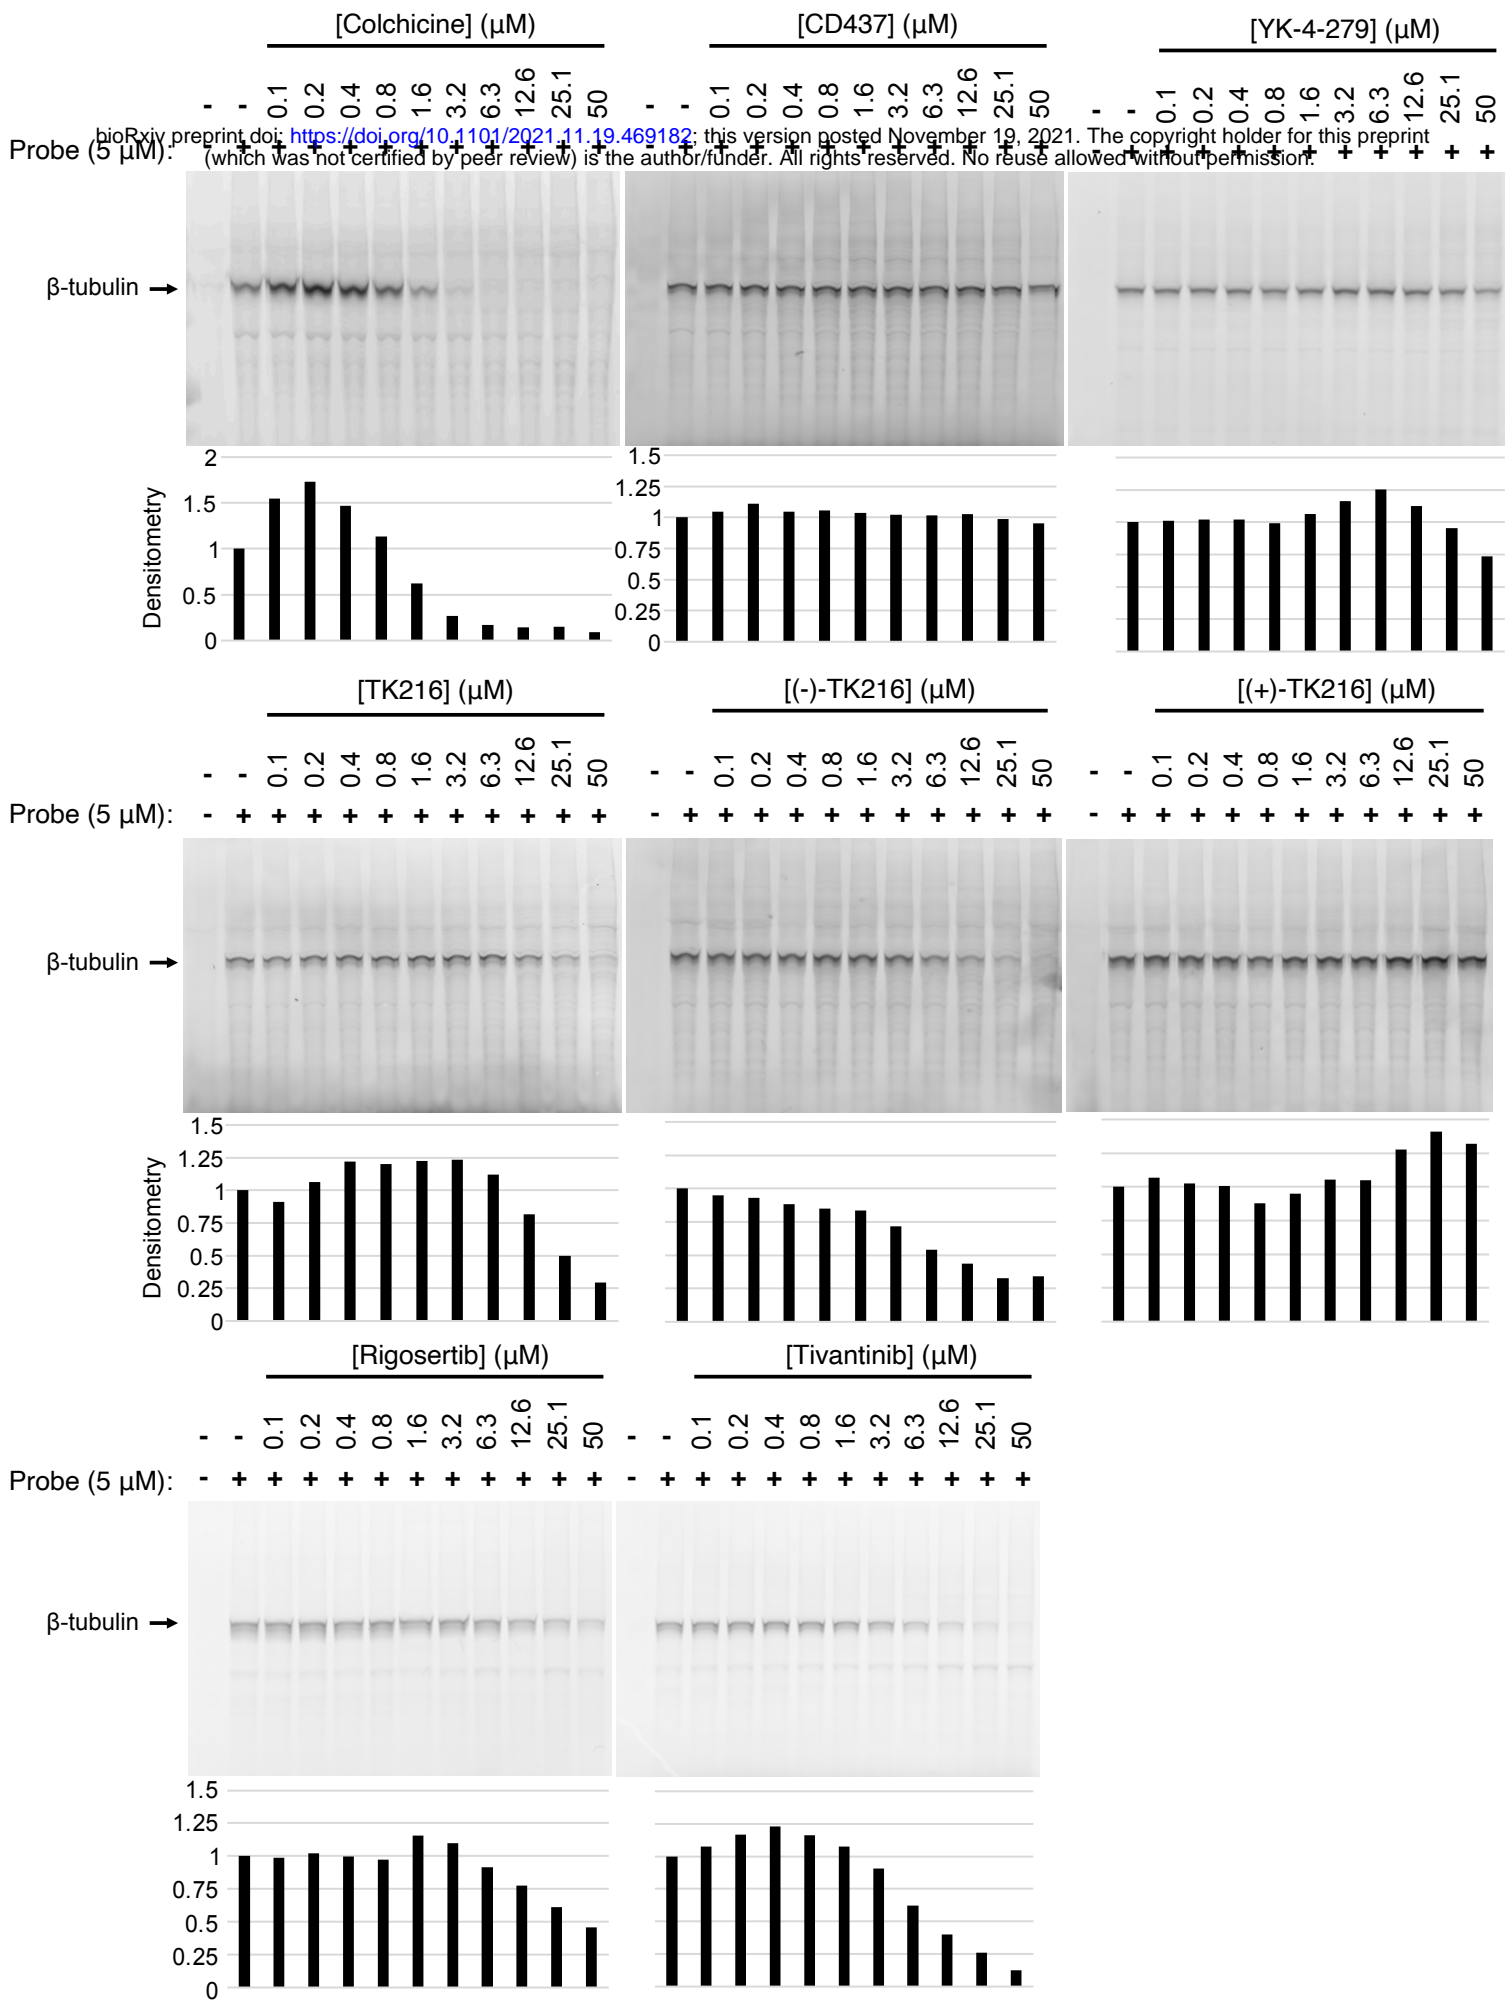

**Supplementary Figure 4.** Full gel images of cell-based competition assay using covalent  $\beta$ -tubulin probe to assess tubulin binding in EWS cells by compounds, colchicine, CD437, YK-4-279, TK216, (-)-TK216, (+)-TK216, rigosertib, and tivantinib. Densitometry graphs under gels were generated using ImageJ to measure intensity of  $\beta$ -tubulin band. Densitometry data were normalized to the control no competitor plus probe lane.
